# Supplementary material for: Measurement error associated with gait cycle selection in treadmill running at various speeds
Source: PeerJ journal article supplement (doi:10.7717/peerj.14921), 2023-03-17
Supplement: Supplemental_File_1.pdf [file Supplemental_File_1.pdf]

# Measurement error associated with gait cycle selection in treadmill running at various speeds

Aaron S. Fox, Jason Bonacci, John Warmenhoven, Meghan F. Keast

## Supplemental File 1

**Figure S1:** Absolute error in peak kinematic variables (i.e. zero-dimensional [0D]) when running at 2.5 m·s<sup>-1</sup> (blue), 3.5 m·s<sup>-1</sup> (yellow) and 4.5 m·s<sup>-1</sup> (red) using a subset of gait cycles versus all gait cycles from the 30-second treadmill bout.

**Figure S2:** Peak absolute error in kinematic variables across the gait cycle (i.e. one-dimensional [1D]) when running at 2.5 m·s<sup>-1</sup> (blue), 3.5 m·s<sup>-1</sup> (yellow) and 4.5 m·s<sup>-1</sup> (red) using a subset of gait cycles versus all gait cycles from the 30-second treadmill bout.

**Figure S3:** Absolute error in peak kinematic variables (i.e. zero-dimensional [0D]) when running at 2.5 m·s<sup>-1</sup> (blue), 3.5 m·s<sup>-1</sup> (yellow) and 4.5 m·s<sup>-1</sup> (red) using two comparative subsets of gait cycles from the 30-second treadmill bout.

**Figure S4:** Peak absolute error in kinematic variables across the gait cycle (i.e. one-dimensional [1D]) when running at 2.5 m·s<sup>-1</sup> (blue), 3.5 m·s<sup>-1</sup> (yellow) and 4.5 m·s<sup>-1</sup> (red) using two comparative subsets of gait cycles from the 30-second treadmill bout.

*Darker points and solid lines in figures equate to the mean  $\pm$  standard deviation. Horizontal lines within boxes equate to the median value, boxes indicate the 25<sup>th</sup> to 75<sup>th</sup> percentile, and dashed whiskers indicate the range. Shaded violins are included to illustrate the distribution of values.*

Abbreviations: FLEX – flexion; EXT – extension; ADD – adduction; IR – internal rotation; ER – external rotation; DF – dorsiflexion; PF – plantarflexion.

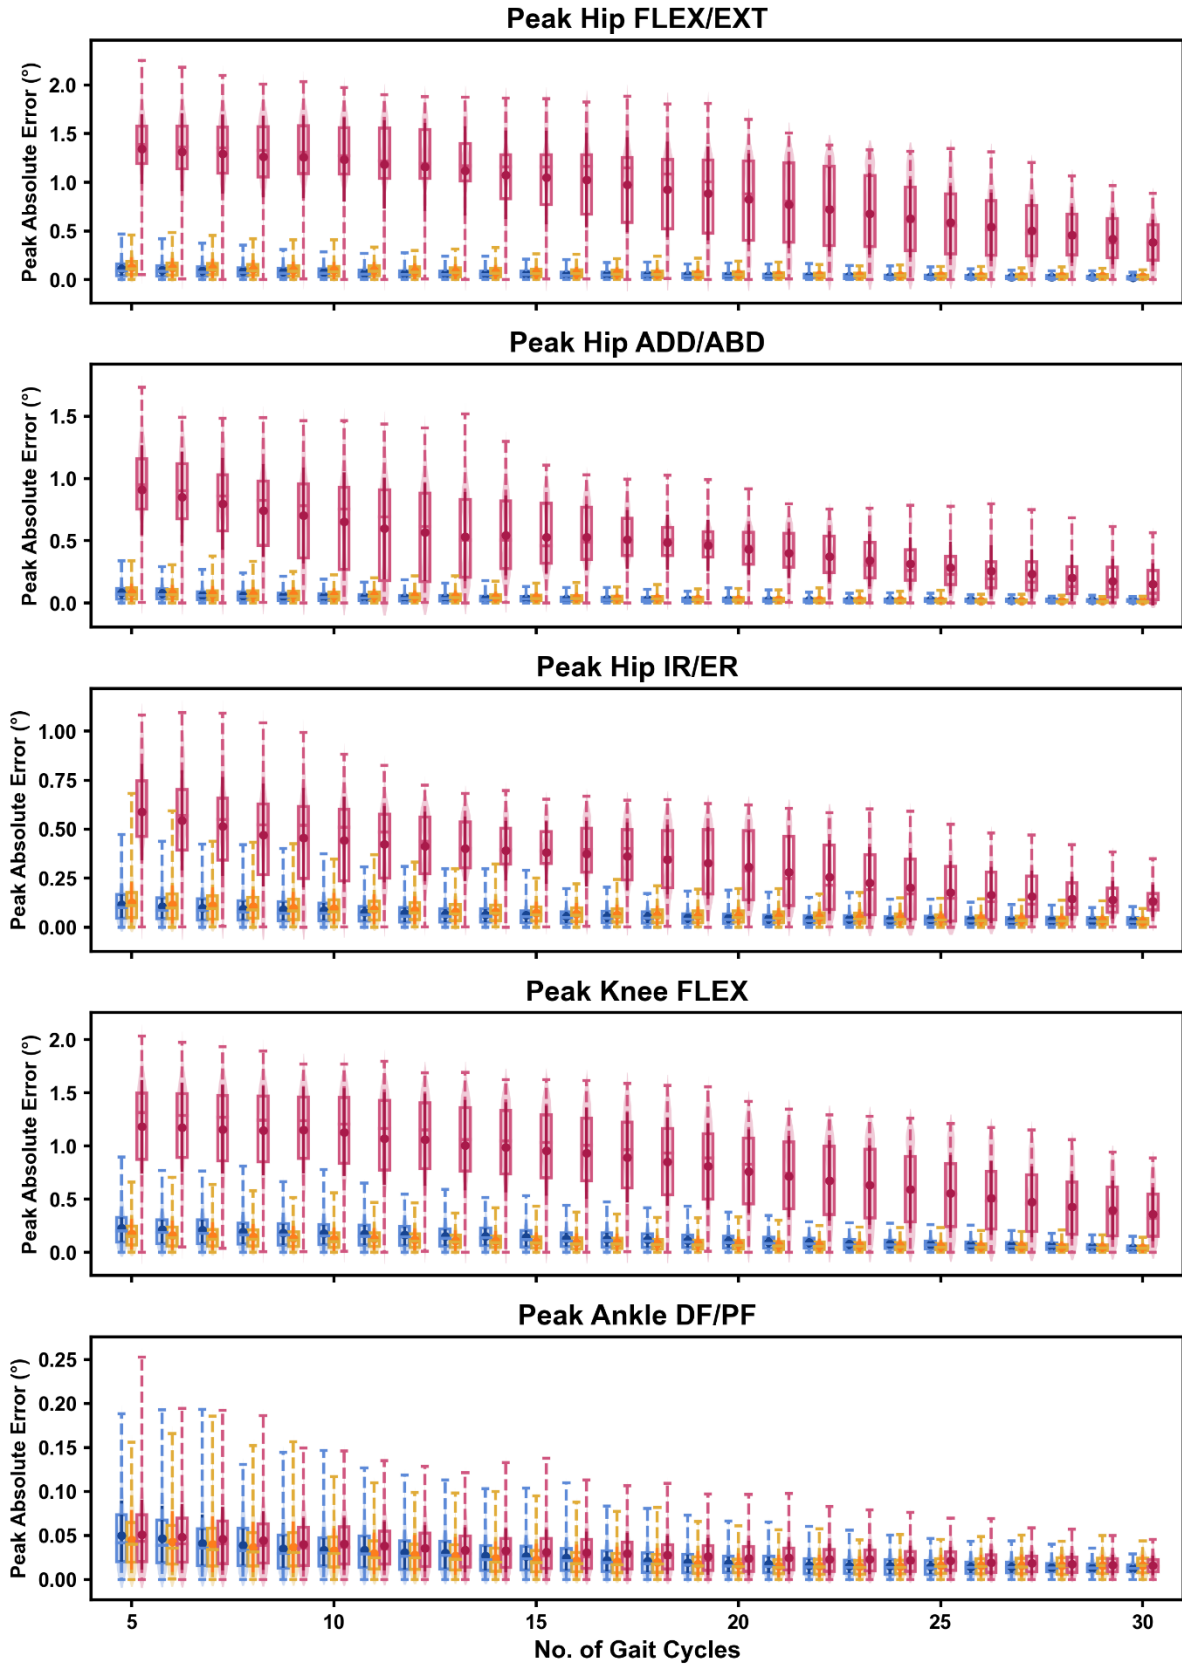

**Figure S1:** Absolute error in peak kinematic variables (i.e. zero-dimensional [0D]) when running at 2.5 m·s<sup>-1</sup> (blue), 3.5 m·s<sup>-1</sup> (yellow) and 4.5 m·s<sup>-1</sup> (red) using a subset of gait cycles versus all gait cycles from the 30-second treadmill bout.

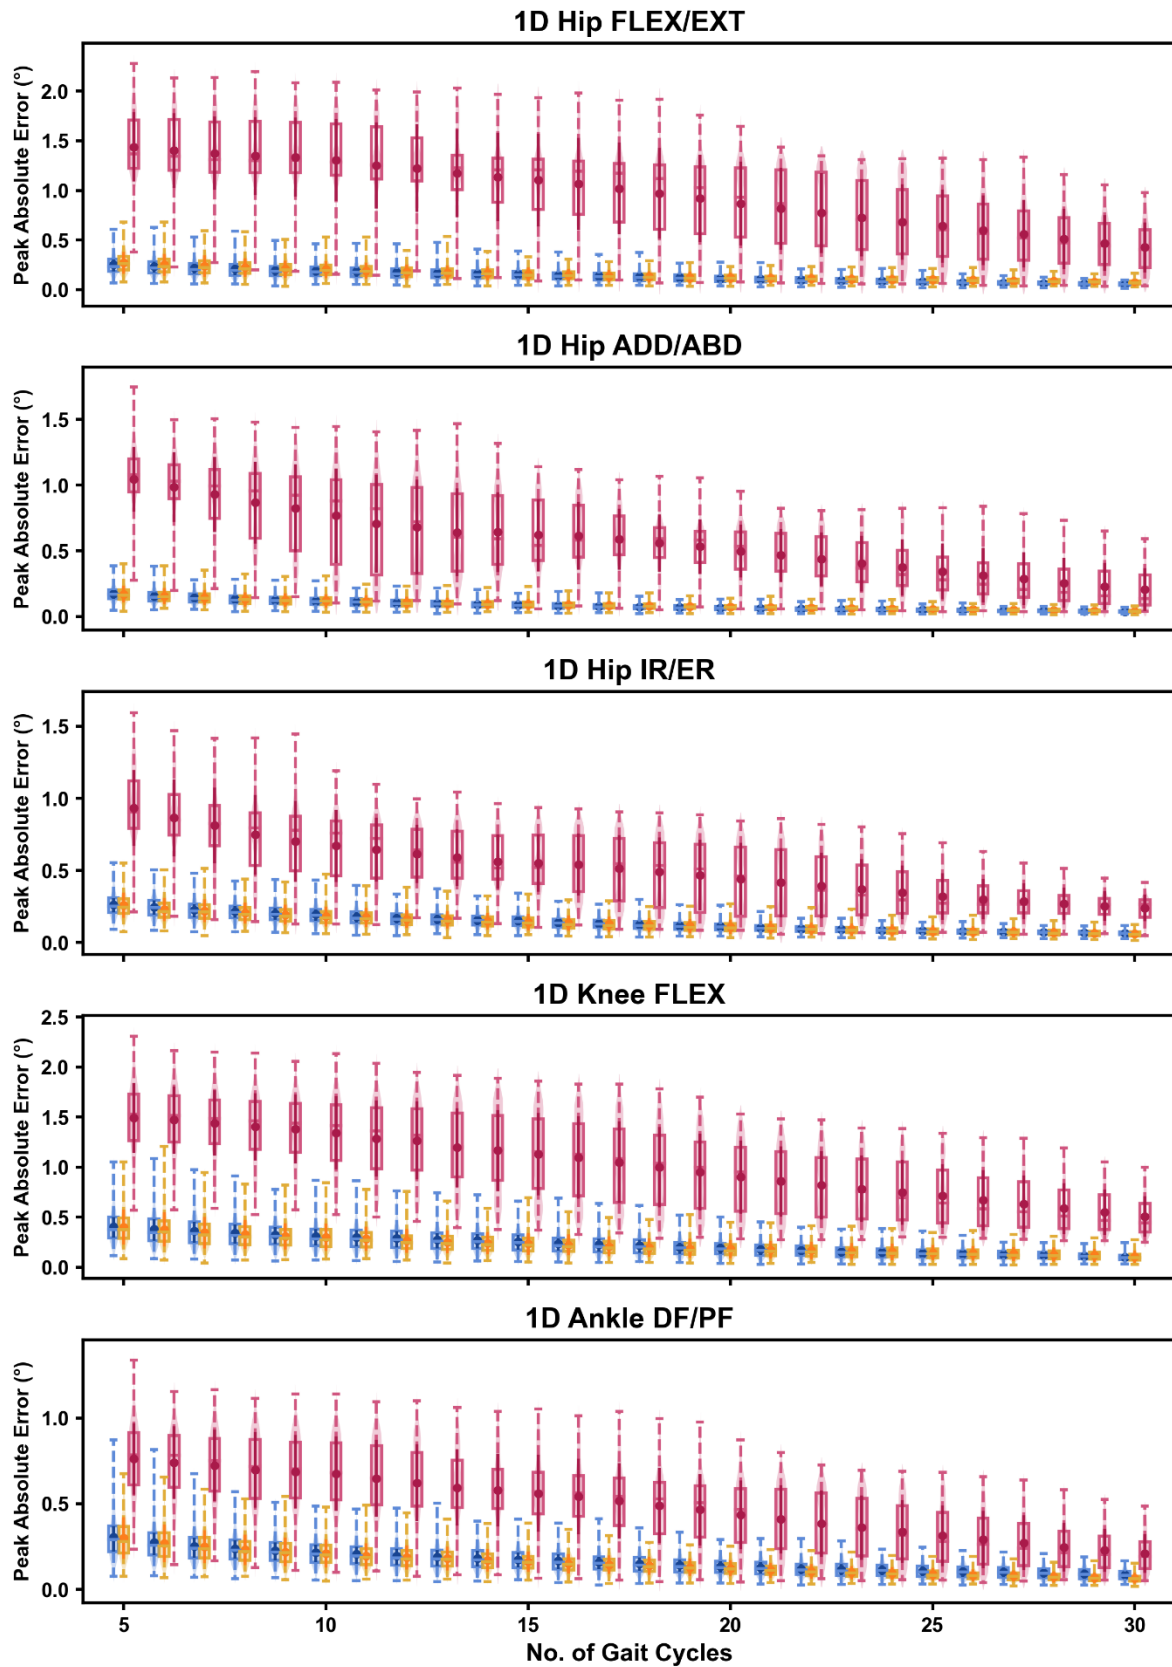

**Figure S2: Peak absolute error in kinematic variables across the gait cycle (i.e. one-dimensional [1D]) when running at 2.5 m·s<sup>-1</sup> (blue), 3.5 m·s<sup>-1</sup> (yellow) and 4.5 m·s<sup>-1</sup> (red) using a subset of gait cycles versus all gait cycles from the 30-second treadmill bout.**

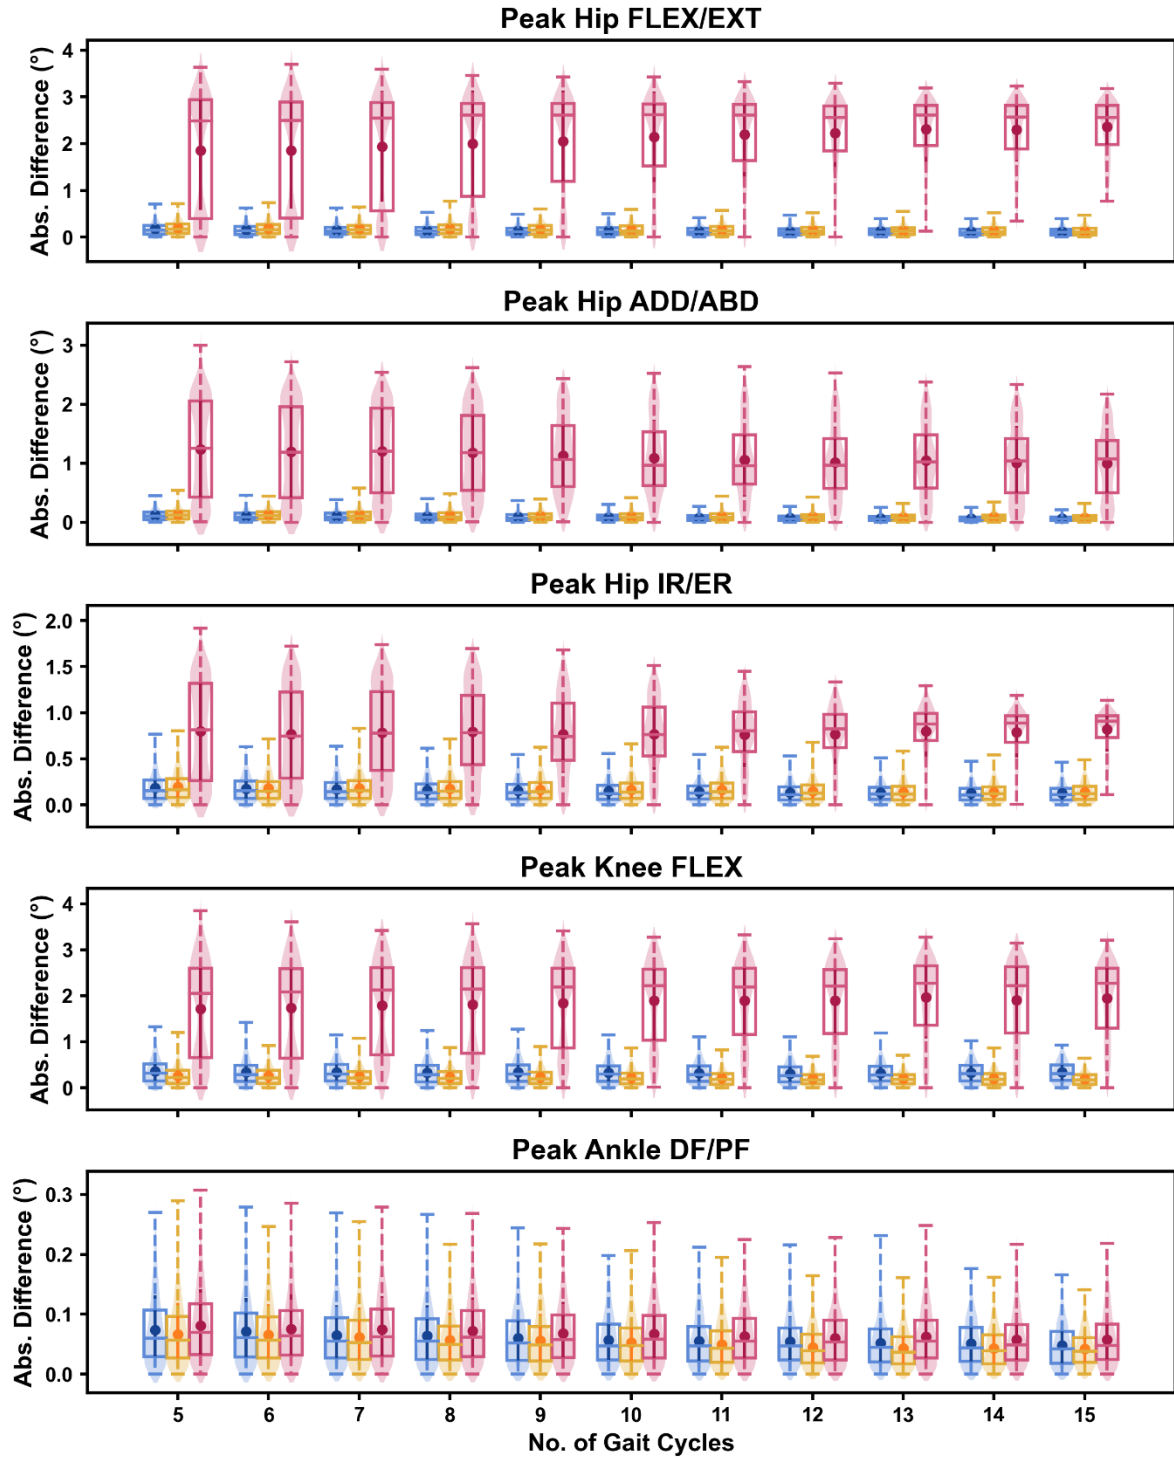

**Figure S3: Absolute error in peak kinematic variables (i.e. zero-dimensional [0D]) when running at 2.5 m·s<sup>-1</sup> (blue), 3.5 m·s<sup>-1</sup> (yellow) and 4.5 m·s<sup>-1</sup> (red) using two comparative subsets of gait cycles from the 30-second treadmill bout.**

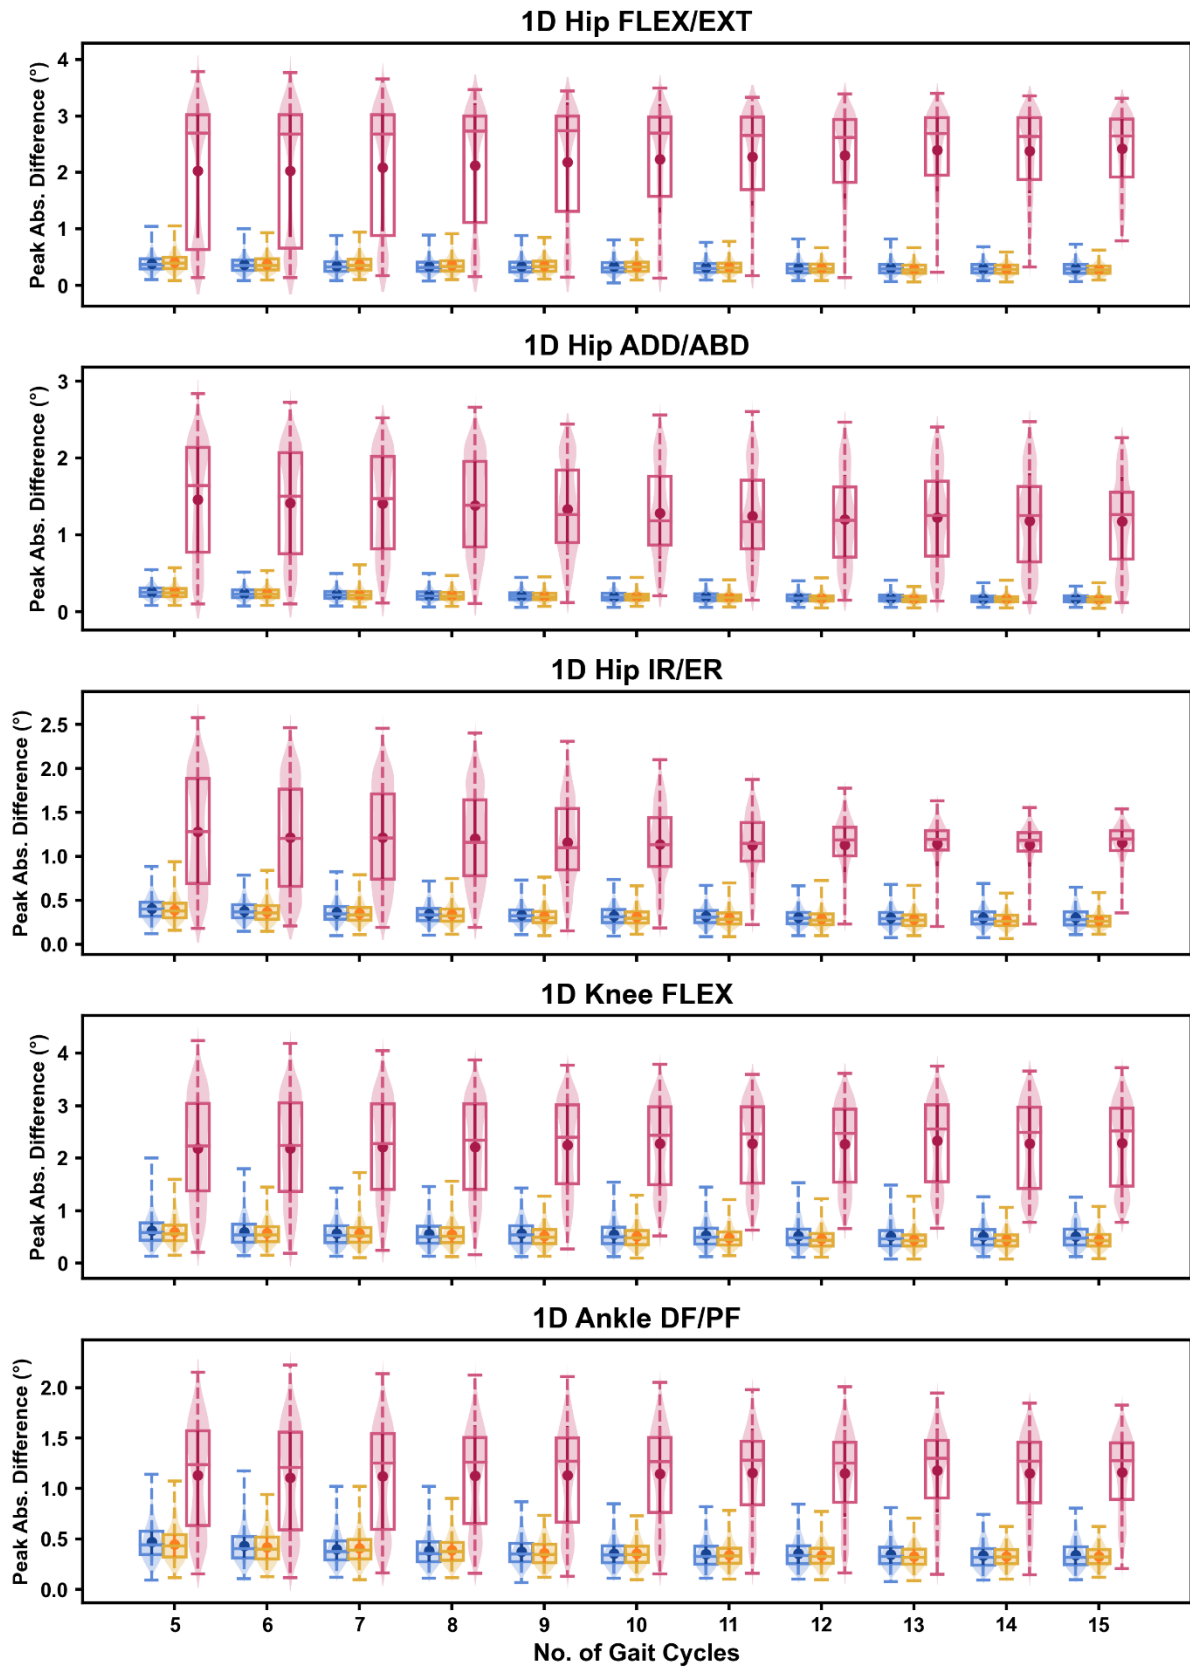

**Figure S4: Peak absolute error in kinematic variables across the gait cycle (i.e. one-dimensional [1D]) when running at 2.5 m·s<sup>-1</sup> (blue), 3.5 m·s<sup>-1</sup> (yellow) and 4.5 m·s<sup>-1</sup> (red) using two comparative subsets of gait cycles from the 30-second treadmill bout.**
